# Supplementary material for: Circulating Extracellular-Vesicle-Incorporated MicroRNAs as Potential Biomarkers for Ischemic Stroke in Patients With Cancer
Source: PubMed Central journal article supplement — J Stroke. 2023 May 2;25(2):251–65. doi: 10.5853/jos.2022.02327 (PMC10250879; doi:10.5853/jos.2022.02327), 2023-05-02
Supplement: jos-2022-02327-Supplementary-Fig-2-3.pdf [file jos-2022-02327-Supplementary-Fig-2-3.pdf]

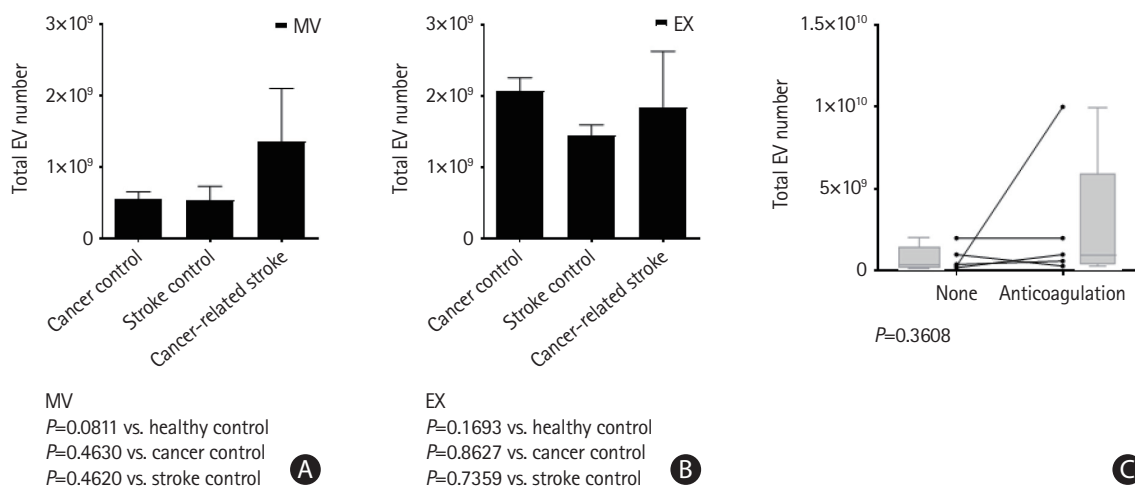

**Supplementary Figure 2.** The numbers of (A) plasma microvesicles (MVs) and (B) exosome (EX) were measured in cancer controls (n=5), stroke controls (n=5), and cancer stroke (n=10) patients, using the nanoparticle tracking analysis (NTA). (C) The changes in the number of plasma MVs prior and after anticoagulation therapy in cancer stroke patients (n=6). NTA showed no changes in the number of MVs with the use of anticoagulation ( $7.16 \pm 6.88 \times 10^8$  vs.  $25.87 \pm 35.51 \times 10^8$ ,  $P=0.3608$ ). EV, extracellular vesicle.

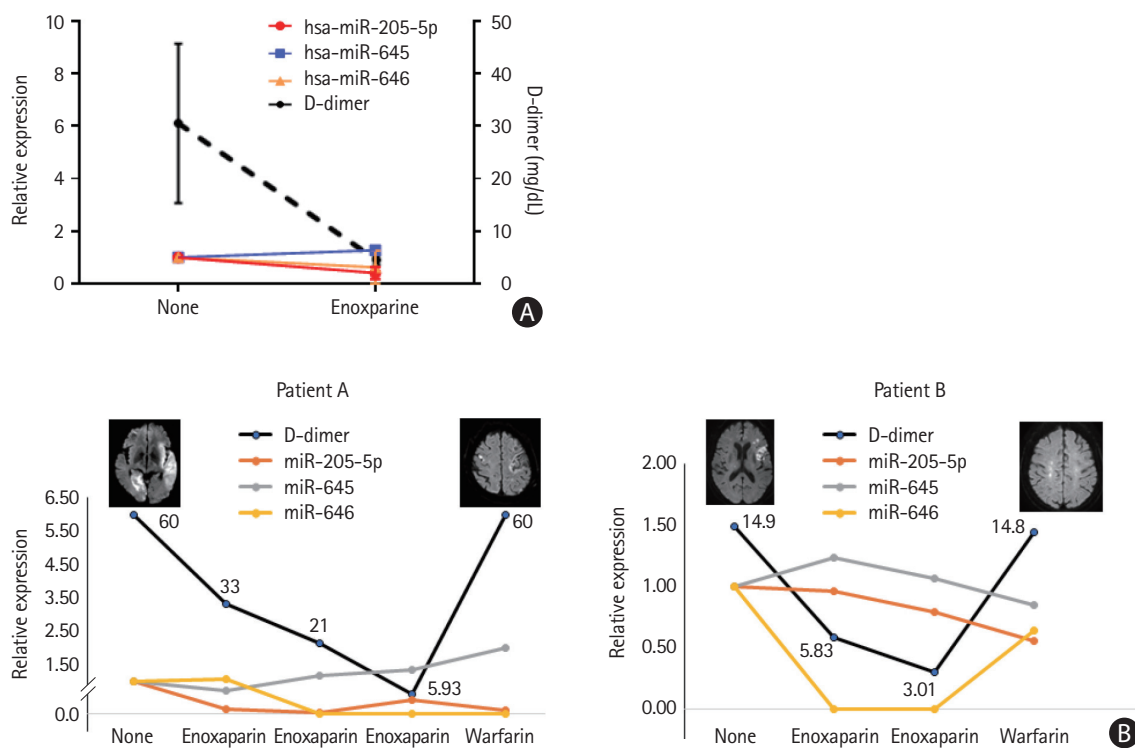

**Supplementary Figure 3.** Effects of anticoagulation therapy in the levels of microvesicle incorporated microRNAs (miRNAs). (A) Serial miRNA changes. (B) Changes in D-dimer (mg/dL) and microvesicle-incorporated miRNAs in two patients with cancer-stroke who had stroke recurrence during the course of anti-coagulation. While D-dimer levels dramatically changed with the use of anticoagulation, miRNA levels were not changed significantly.
